# Supplementary material for: 40 Years of Duocarmycins: A Graphical Structure/Function Review of Their Chemical Evolution, from SAR to Prodrugs and ADCs
Source: PubMed Central journal article supplement (PMC9795467; doi:10.1021/jacsau.2c00448), 2022-11-15
Supplement: au2c00448_si_002.pdf [file au2c00448_si_002.pdf]

# 40 years of duocarmycins: a graphical structure/function review of their chemical evolution, from SAR to prodrugs and ADCs

Jan G. Felber and Oliver Thorn-Seshold; LMU Munich: <https://thornseshold.cup.uni-muenchen.de>

## (1) SAR COMPOUNDS

## (2) PRODRUGS / BIFUNCTIONAL CONJUGATES

## (3) ANTIBODY-DRUG CONJUGATES

### Journal abbreviations

ANIE Angewandte Chemie International Edition  
 BMC Biorganic & Medicinal Chemistry  
 BMCL Bioorganic & Medicinal Chemistry Letters  
 EJOC European Journal of Organic Chemistry  
 JACS Journal of the American Chemical Society  
 JMC Journal of Medicinal Chemistry  
 JOC The Journal of Organic Chemistry  
 OBC Organic & Biomolecular Chemistry

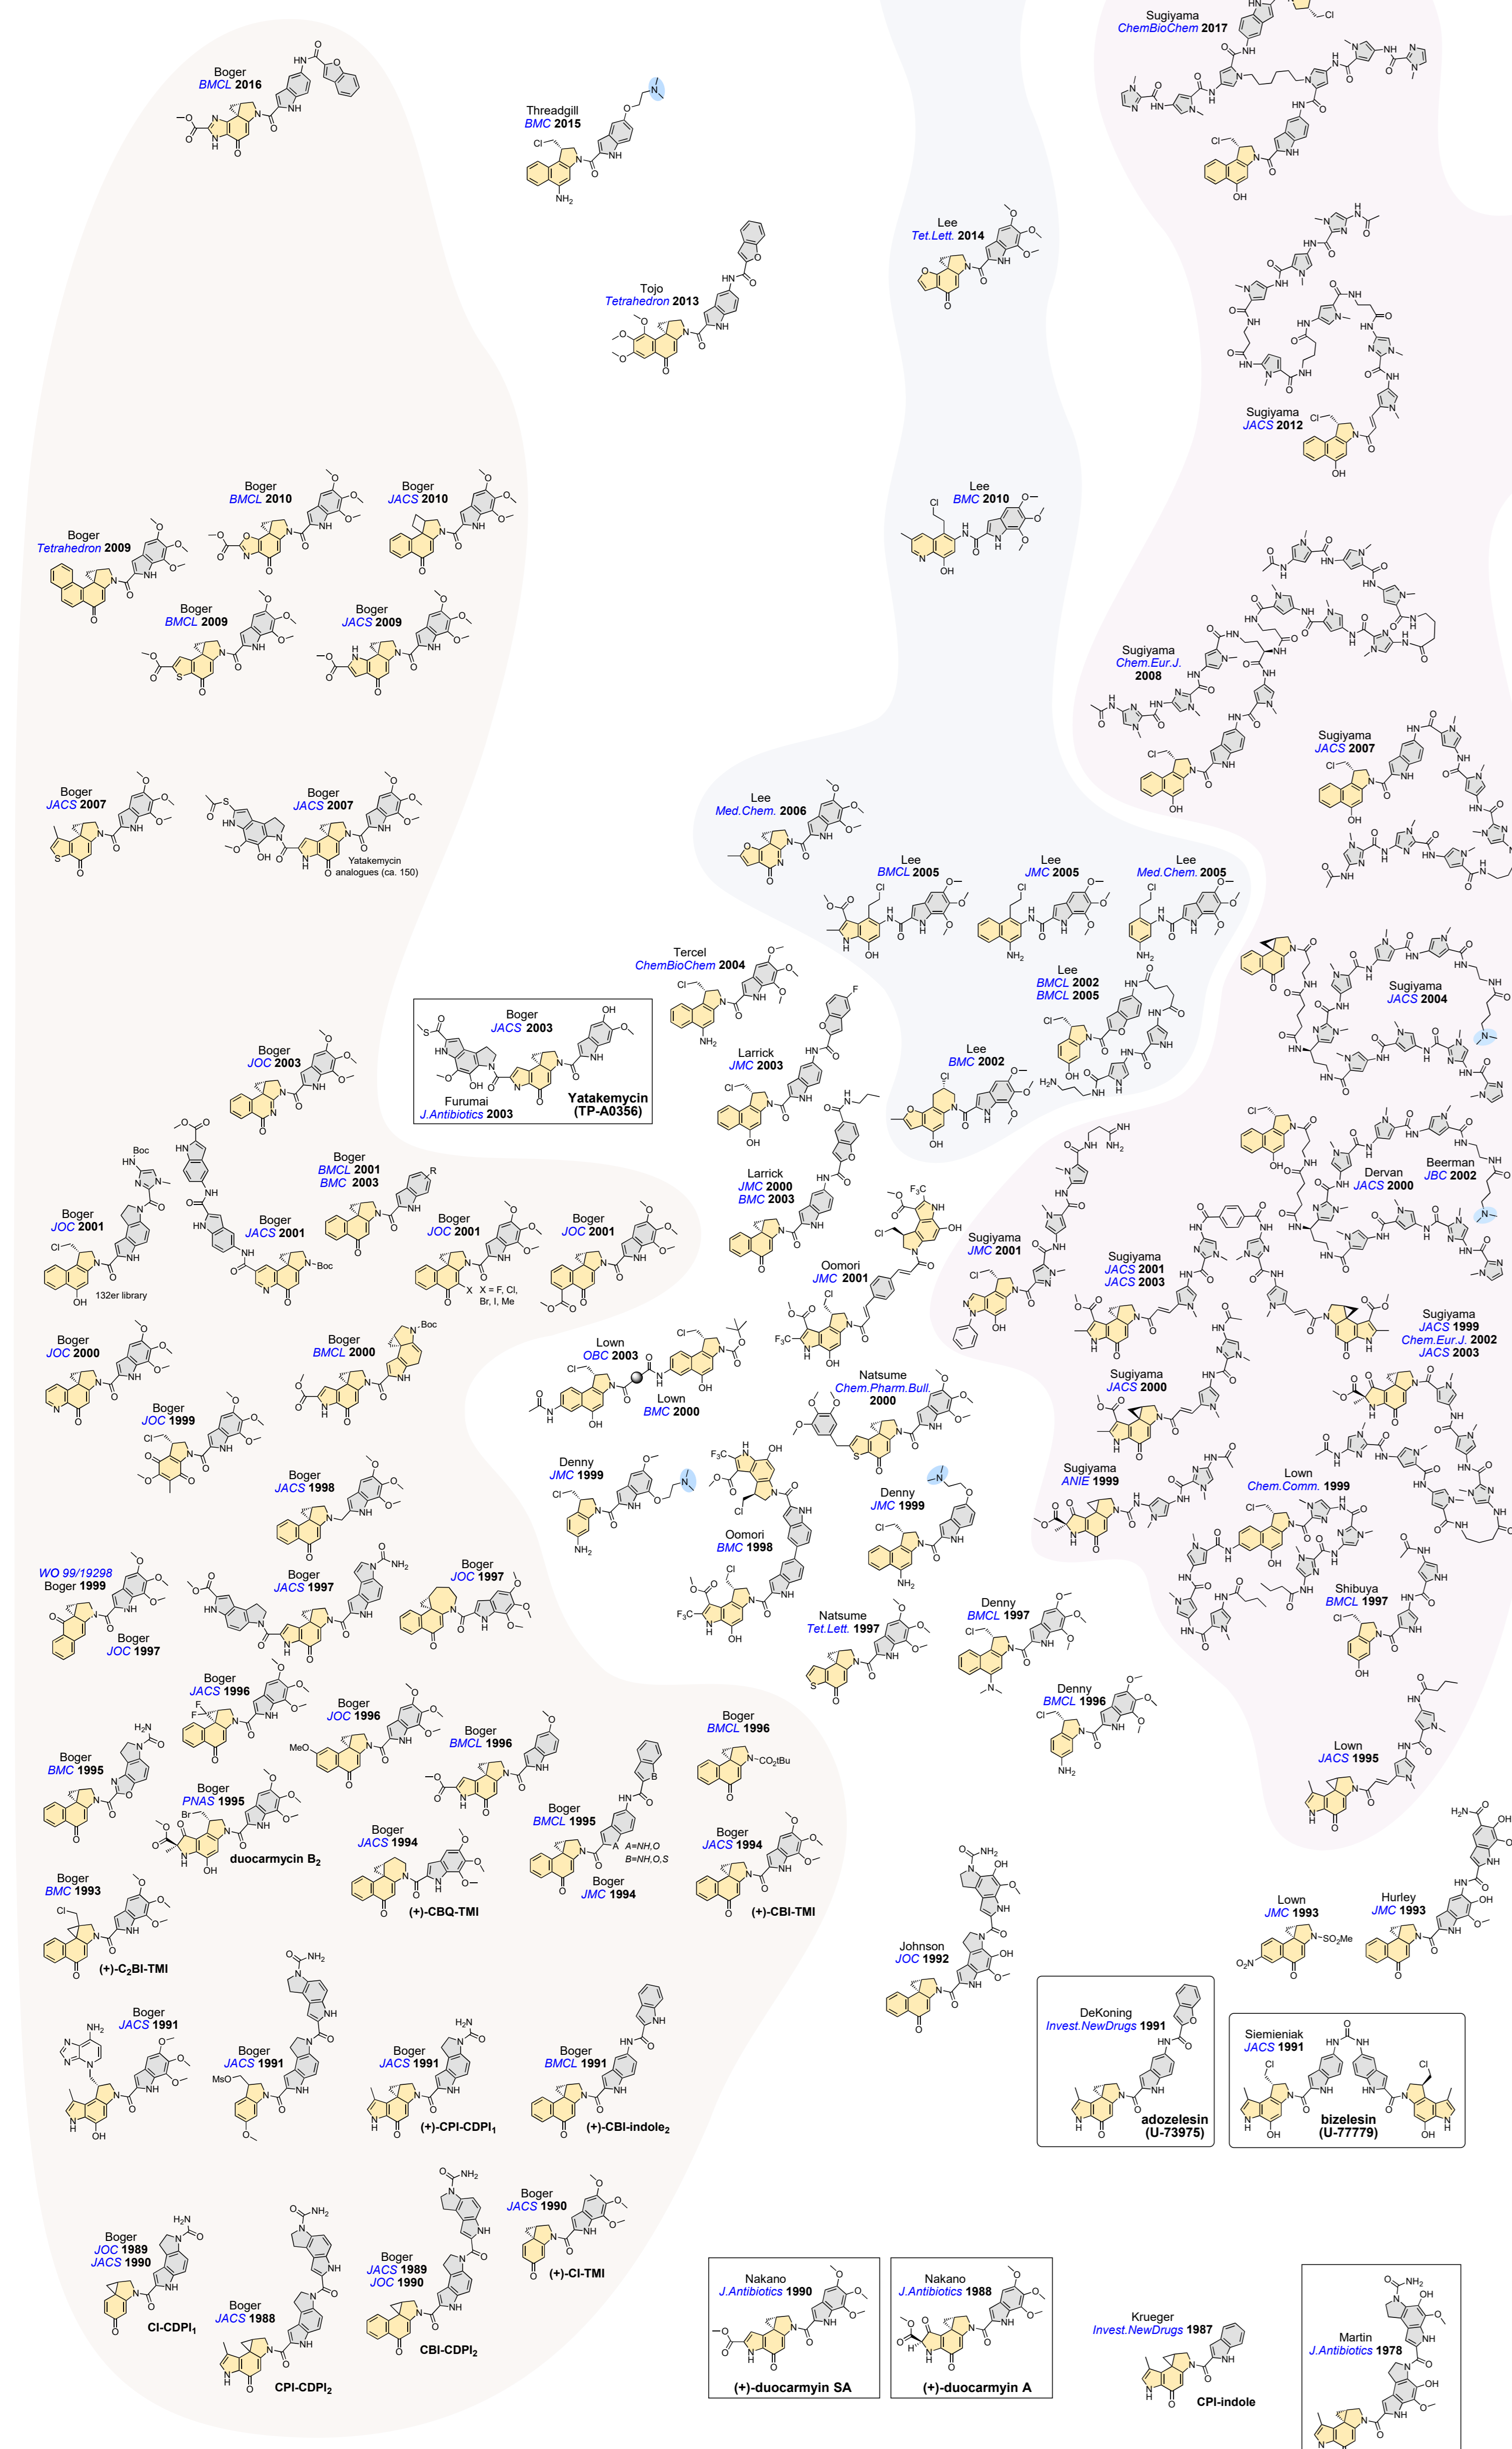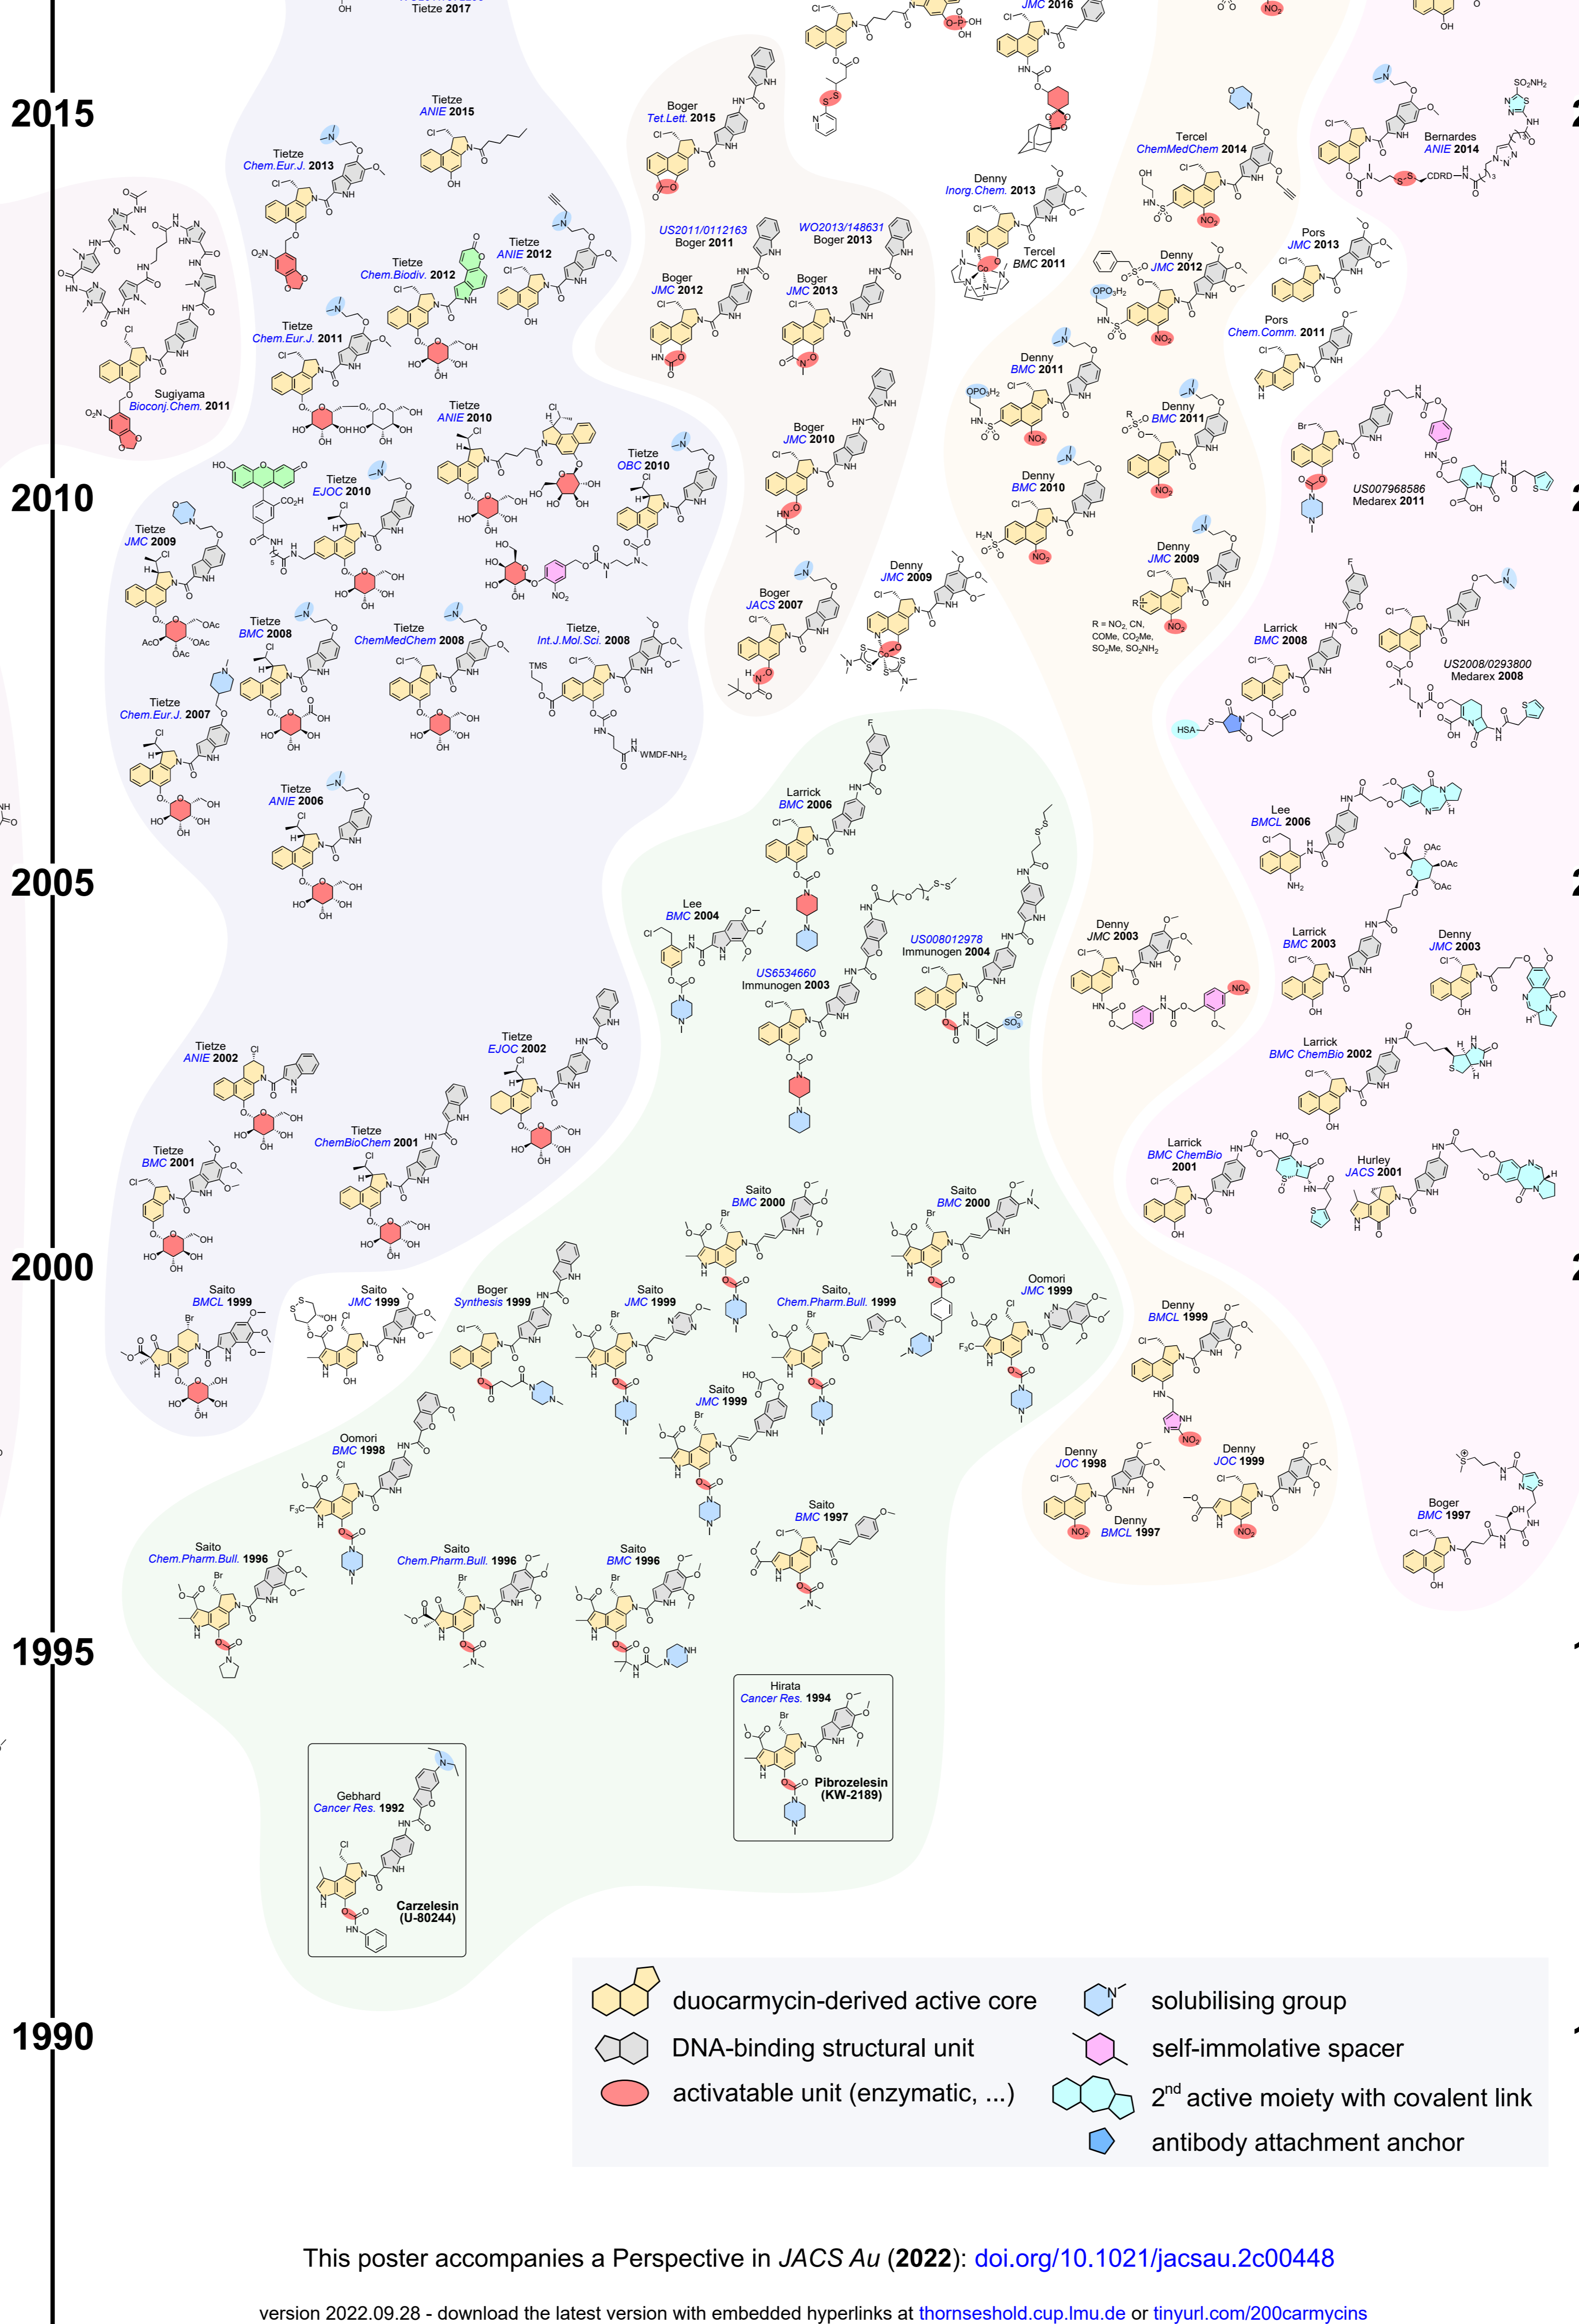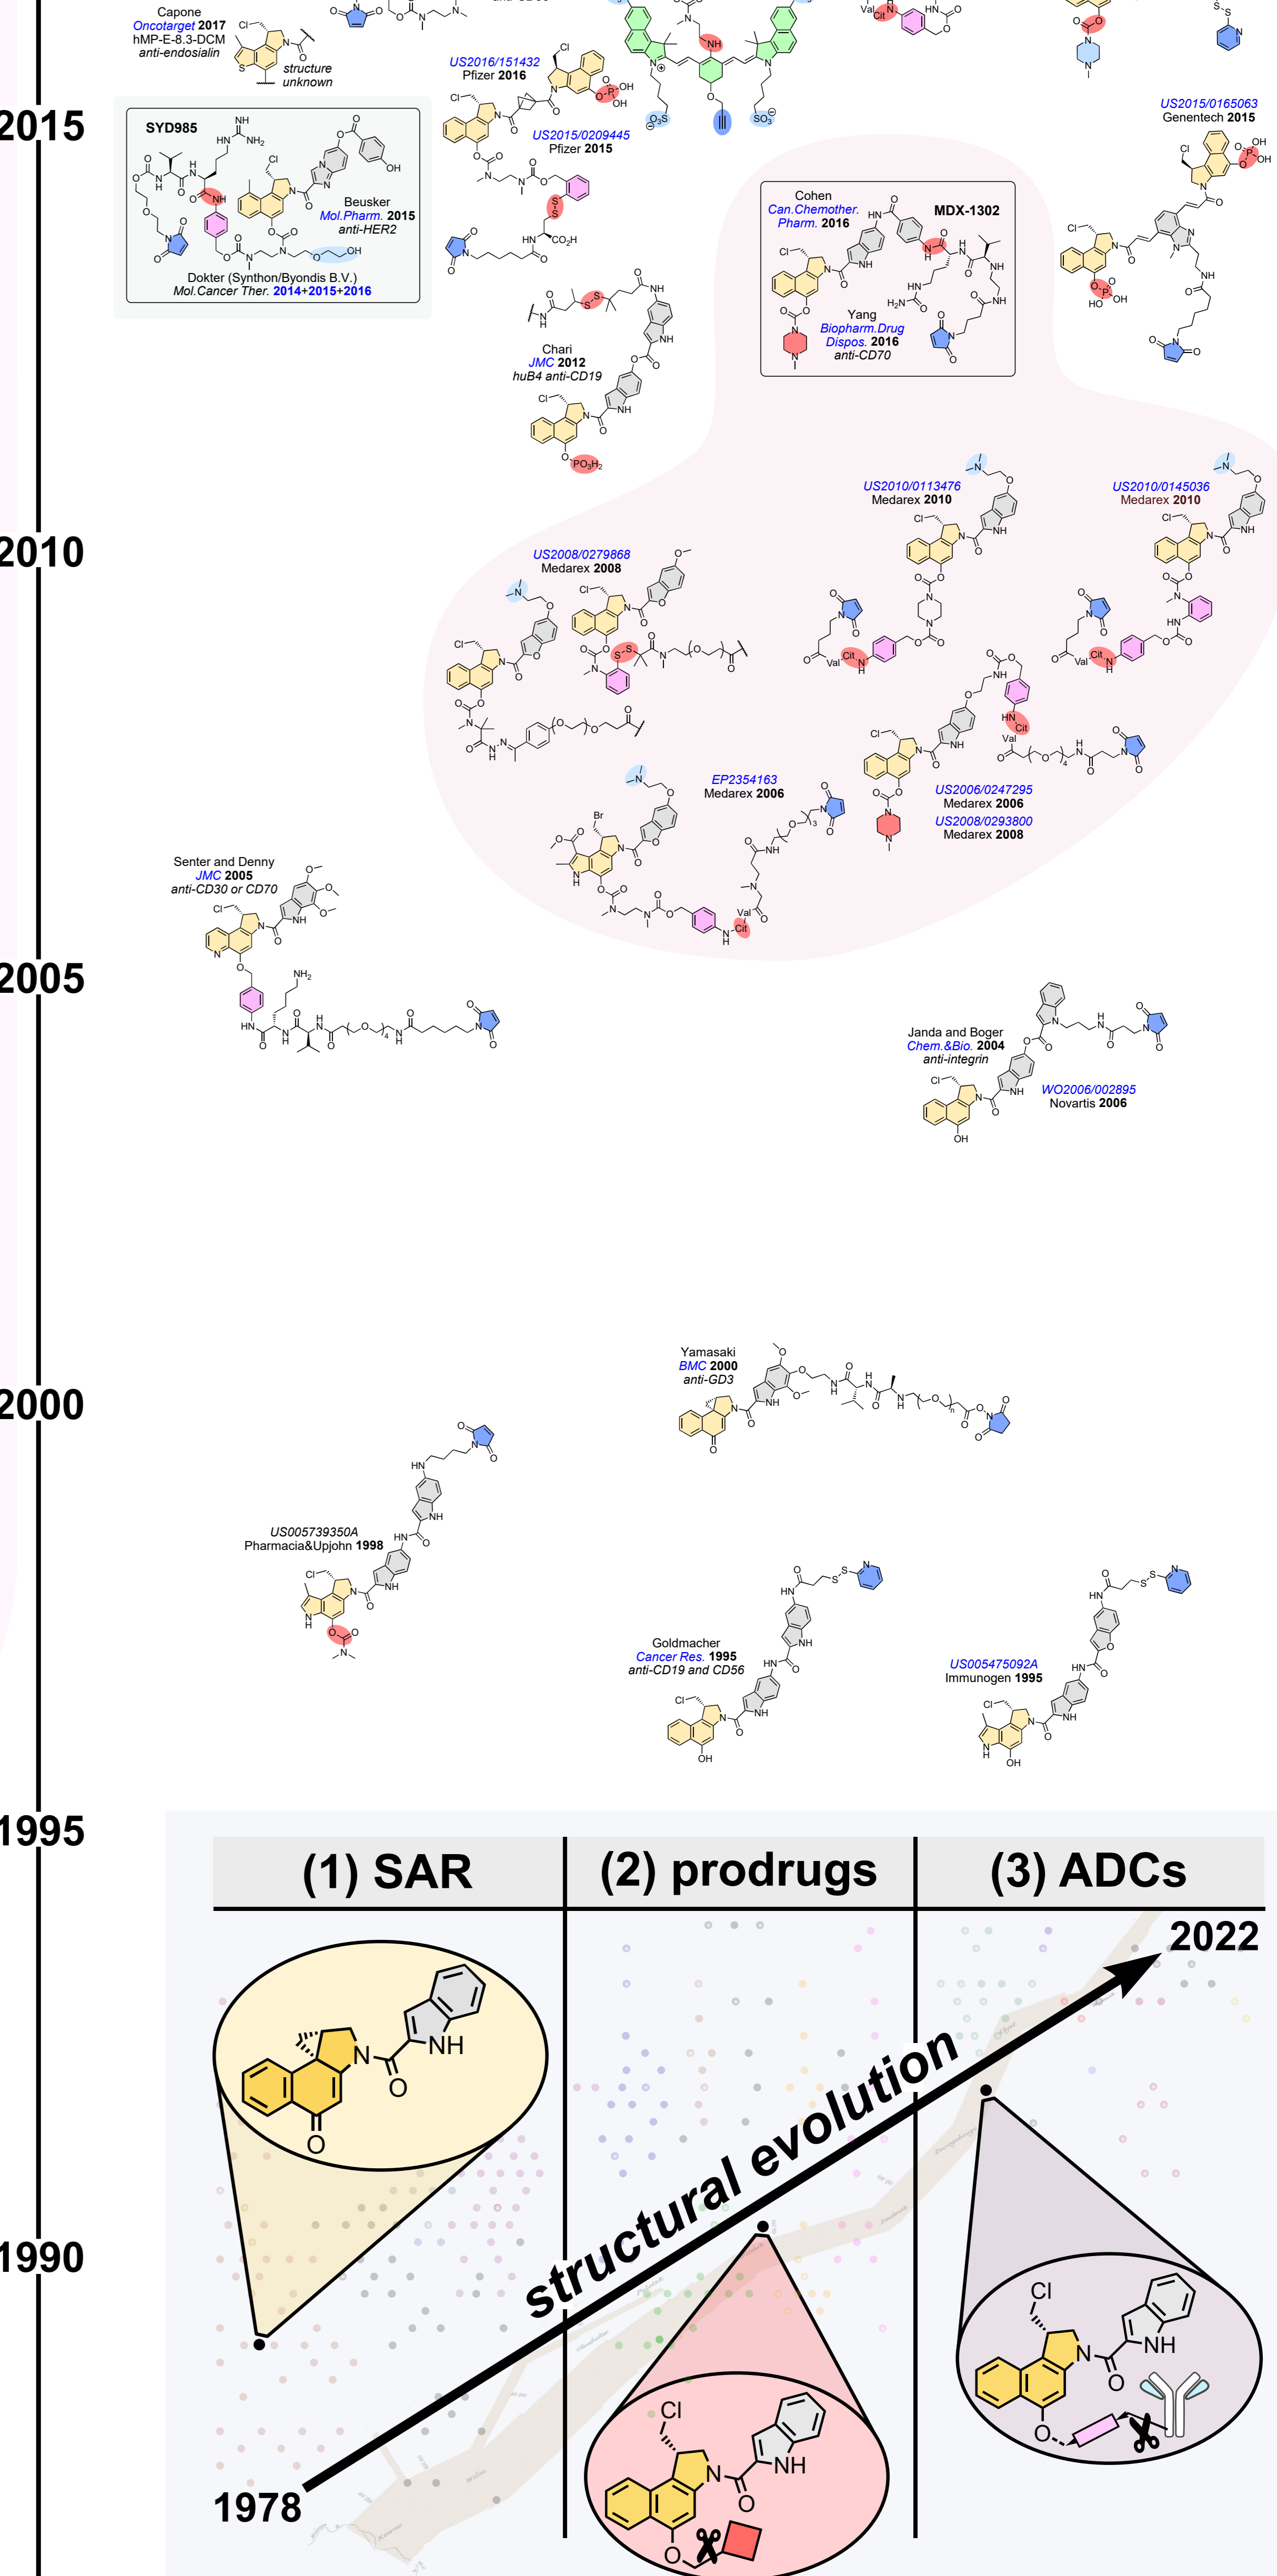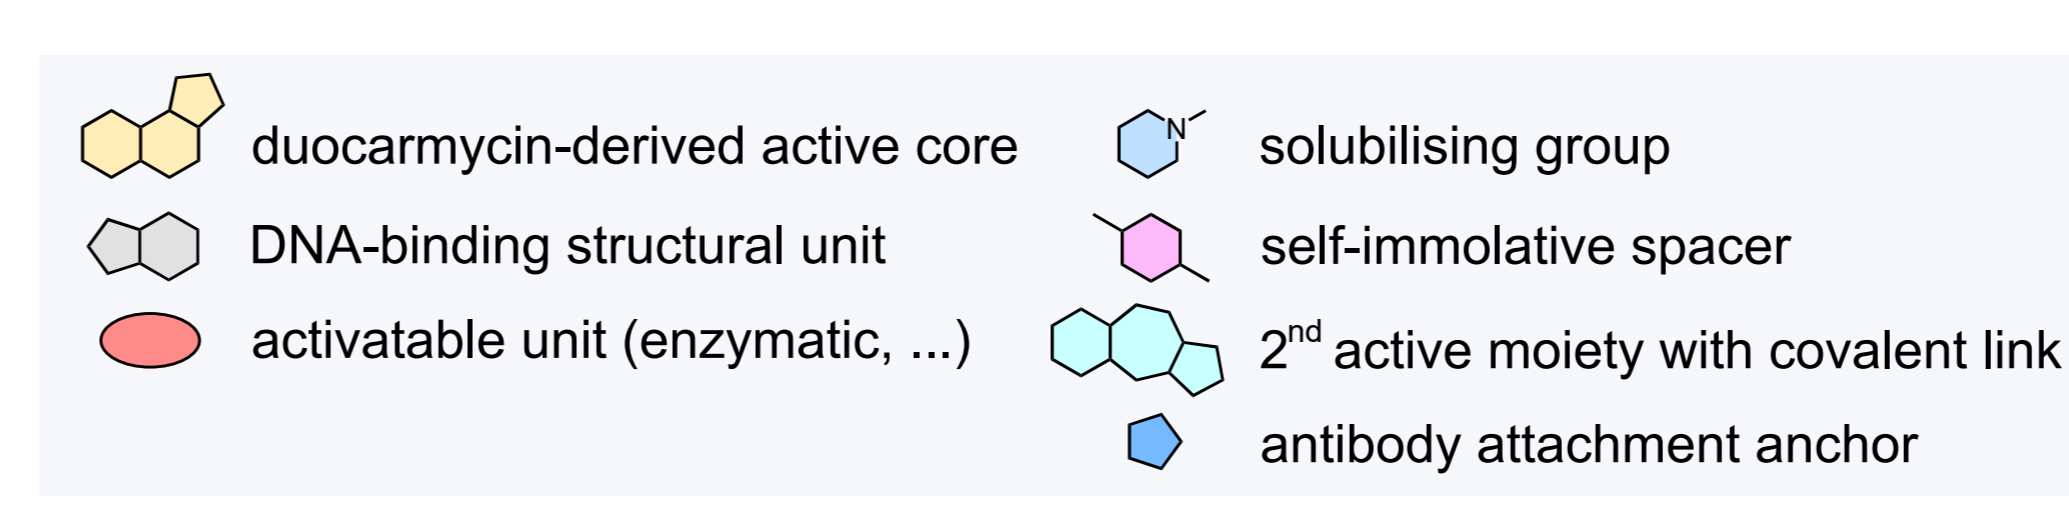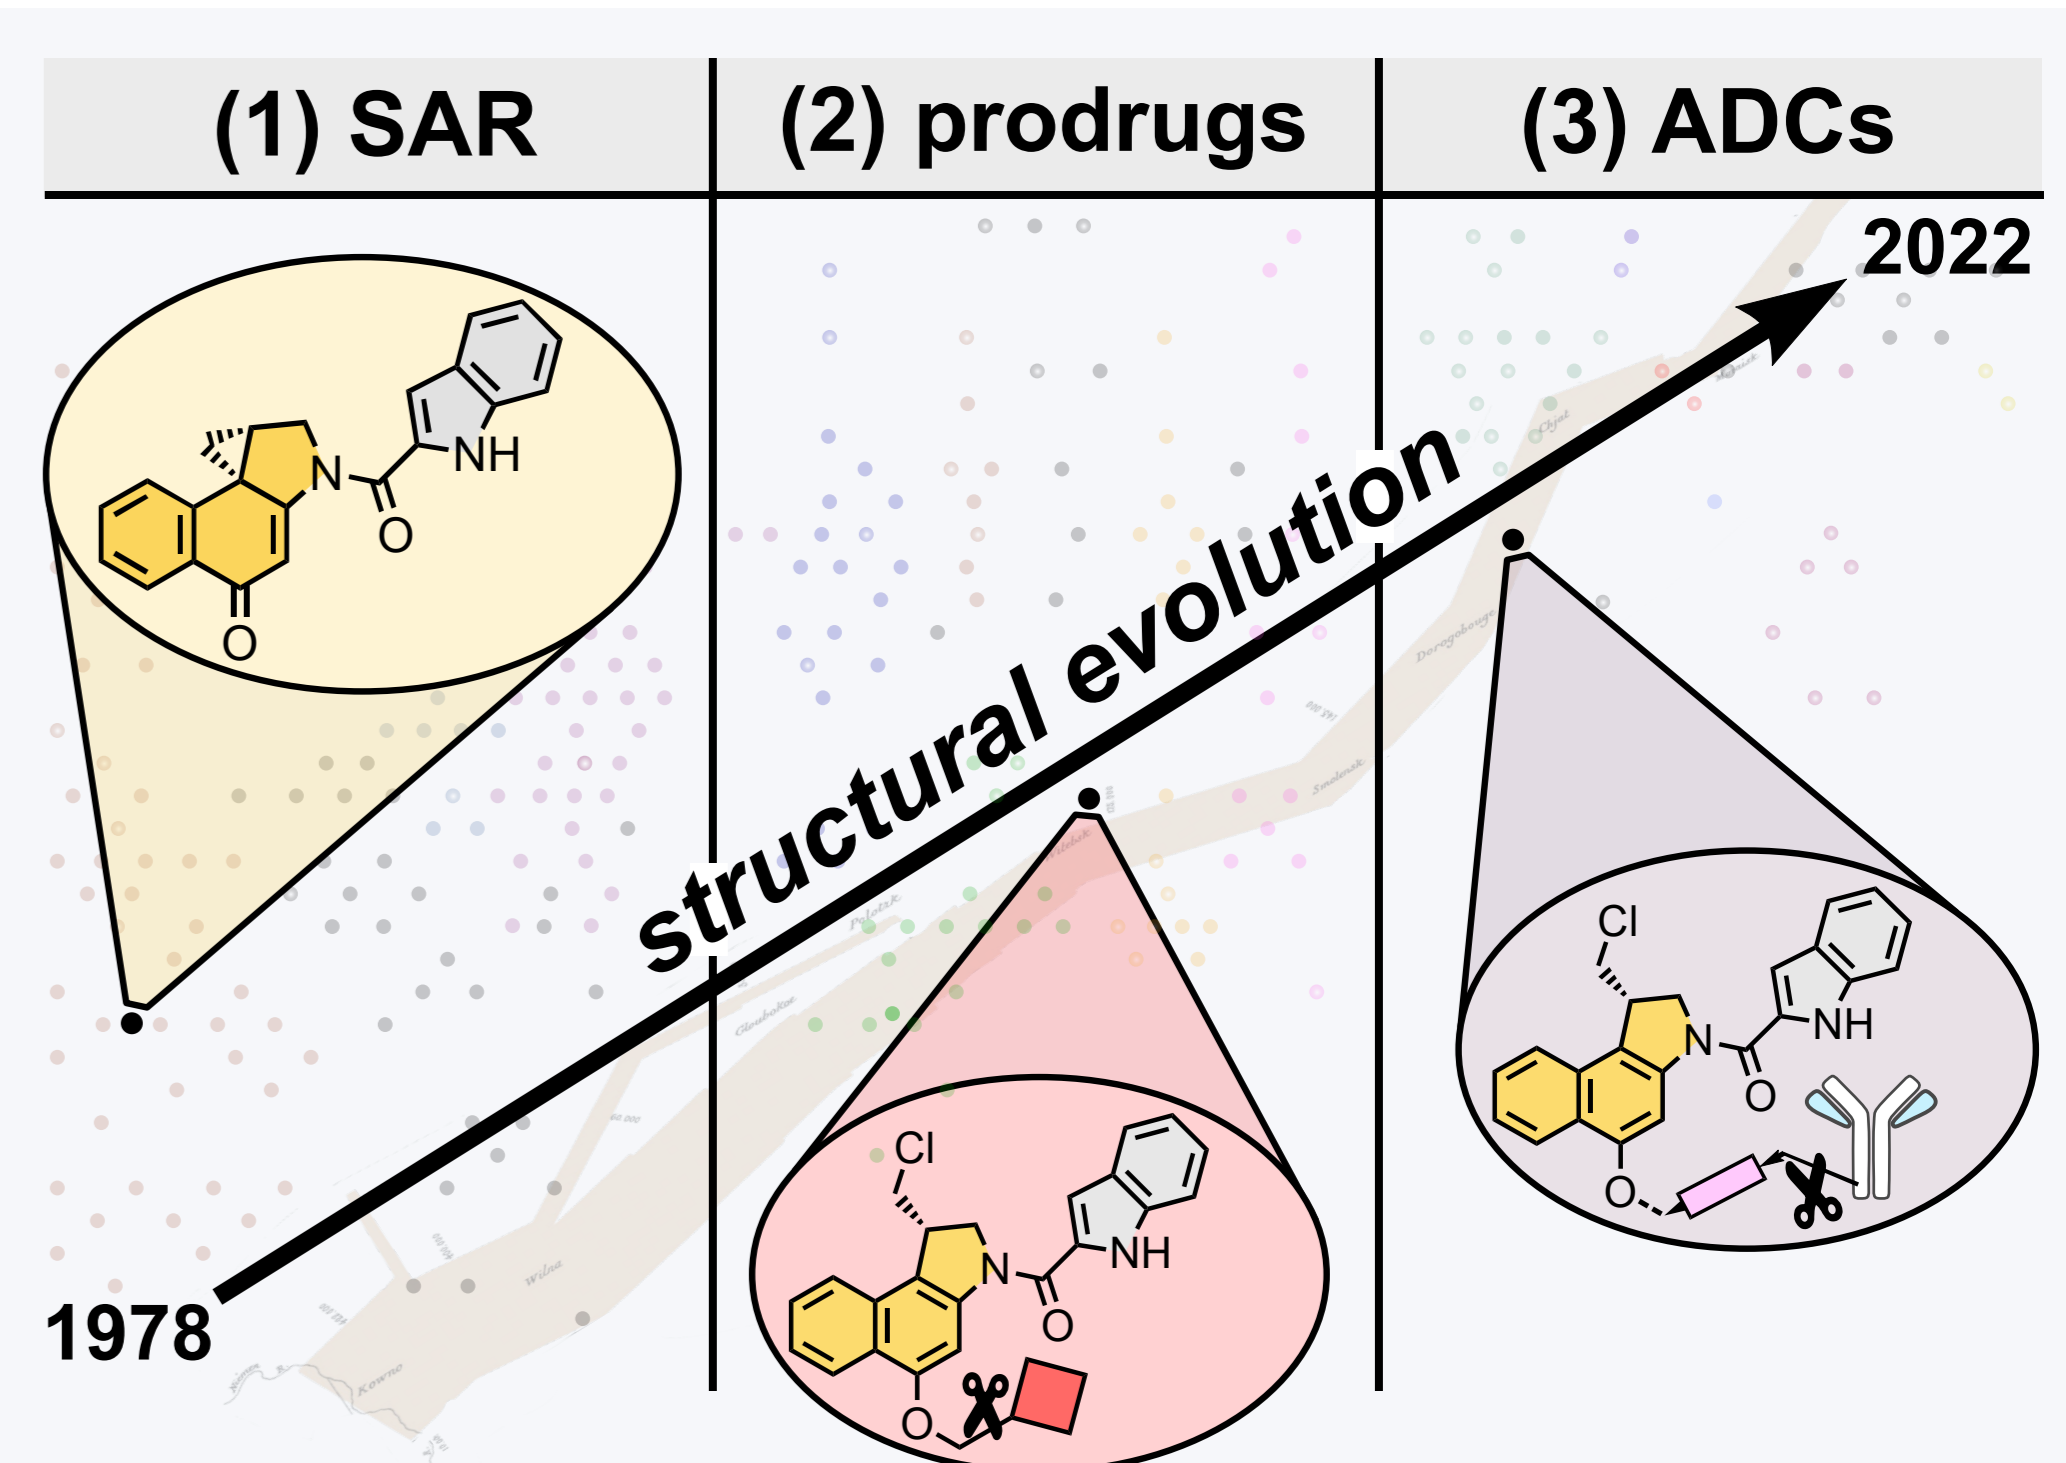

This poster accompanies a Perspective in *JACS Au* (2022): [doi.org/10.1021/jacsau.2c00448](https://doi.org/10.1021/jacsau.2c00448)  
 version 2022.09.28 - download the latest version with embedded hyperlinks at [thornseshold.cup.lmu.de](https://thornseshold.cup.lmu.de) or [tinyurl.com/200carmycins](https://tinyurl.com/200carmycins)
